# Supplementary material for: The kinetic dose limit in room-temperature time-resolved macromolecular crystallography
Source: PubMed Central journal article supplement (PMC3284346; doi:10.1107/s090904951105549x), 2012-01-18
Supplement: s-19-00264-sup1.pdf [file s-19-00264-sup1.pdf]

## Supplemental Material

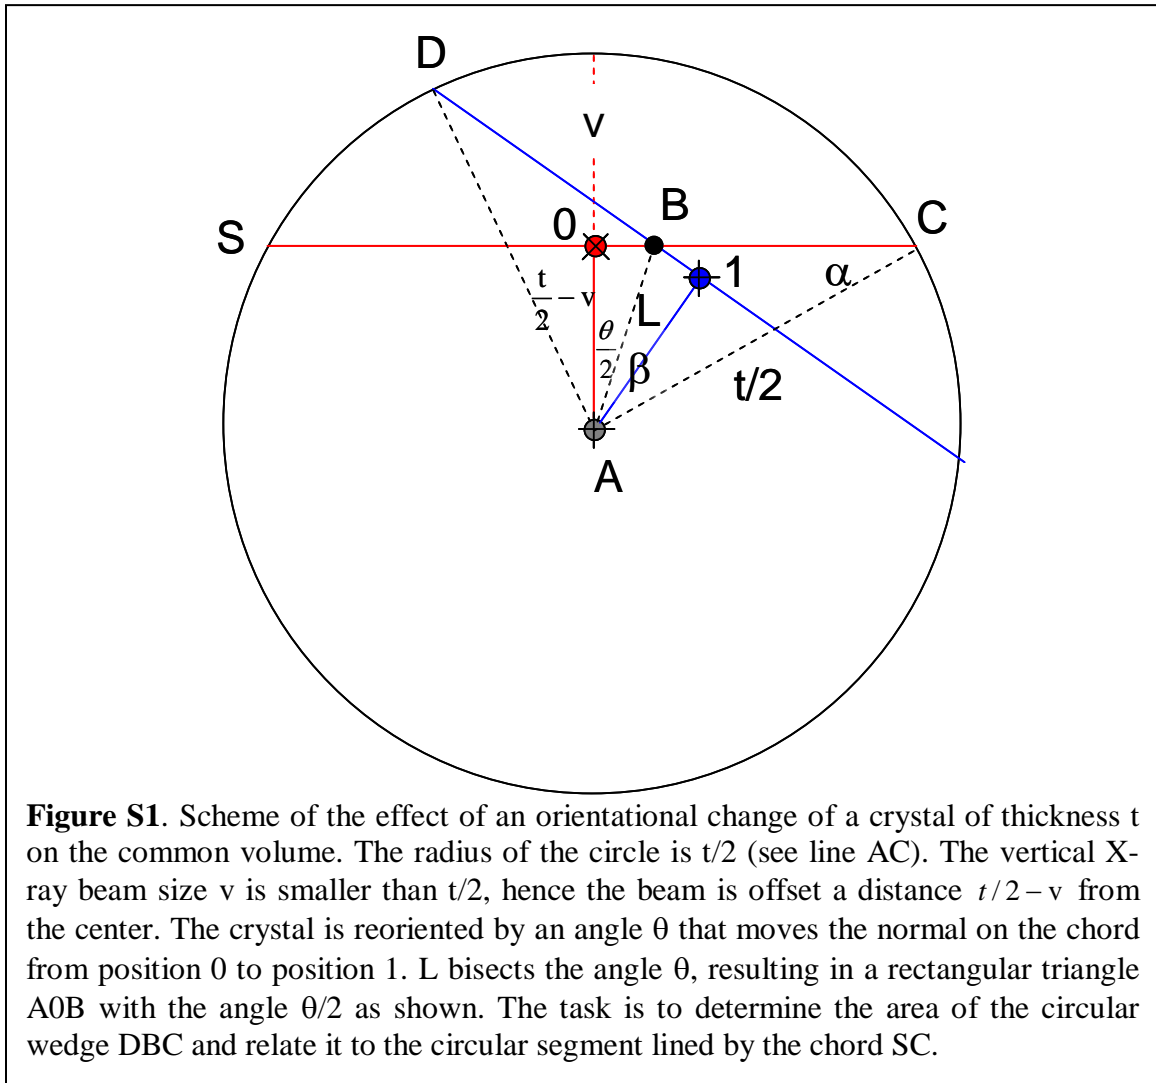

### Calculation of the common volume

The circular segment  $DBC$  denotes the common area. The relative common volume in percent is the ratio of the segment  $DBC$  relative to the area of a circular cap (segment) bounded by the chord  $SC$  times 100. The area  $A$  of the segment bounded by the chord  $SC$  can be calculated as

$$A = \left(\frac{t}{2}\right)^2 \arccos\left(1 - \frac{2v}{t}\right) - \sqrt{tv - v^2} \left(\frac{t}{2} - v\right). \quad (\text{S1})$$

The calculation of the segment DBC is more difficult. If we rotate an angle  $\theta$ , the normal on the chord rotates from position 0 to position 1 (see drawing). The line AB (denoted L) bisects the angle  $\theta$ . We can calculate L as

$$L = \frac{\left(\frac{t}{2} - v\right)}{\cos \frac{\theta}{2}}. \quad (\text{S2})$$

We then determine the angle OBA, which is:  $\angle OBA = 90^\circ - \frac{\theta}{2}$ . From this we can determine the angle ABC:  $\angle ABC = 90^\circ + \frac{\theta}{2}$ . Using the rectangular triangle AOC, we can determine the angle  $\alpha$  as:  $\alpha = \arcsin\left(1 - \frac{2v}{t}\right)$ . Since we have now determined two of the three angles of triangle ABC, we can determine the last,  $\beta$  as:

$$\beta = 180^\circ - \angle ABC - \alpha = 90^\circ - \frac{\theta}{2} - \arcsin\left(1 - \frac{2v}{t}\right). \quad (\text{S3})$$

The angle  $\beta$  is also referred to in the text. Since triangle ABD is obtained from ABC by mirroring it at L, both triangles share the same angle  $\beta$ , and consequently  $2\beta$  is the opening angle of the circular sector ACD, whose area can be easily calculated:

$$F_s = \frac{1}{2} \frac{2\beta}{180^\circ} \pi \left(\frac{t}{2}\right)^2. \quad (\text{S4})$$

In order to calculate the area of the section DBC we need to subtract from  $F_s$  the two triangles ABC and ABD whose areas are the same. We have determined two sides and all angles of the triangle ABC, and its area is consequently:

$$F_T = \frac{1}{2} \frac{t}{2} L \sin \beta = \frac{t}{4} \frac{\left(\frac{t}{2} - v\right)}{\cos \frac{\theta}{2}} \sin \beta. \quad (\text{S5})$$

So the common area is now:

$$F_C = F_s - 2F_T = \frac{1}{2} \frac{2\beta}{180^\circ} \pi \left(\frac{t}{2}\right)^2 - \frac{t}{2} \frac{\left(\frac{t}{2} - v\right)}{\cos \frac{\theta}{2}} \sin \beta. \quad (\text{S6})$$

Equation S6 is referenced in the text as eqn. 1 with the first term slightly simplified and  $t/2$  factored out of the bracket in the second term (see also eqn. S7), and it is also shown in fig. 2B.

The common volume  $V_C$  in percent is  $F_C / A \times 100$ :

$$V_C[\%] = \frac{\left(\frac{t}{2}\right)^2 \left[ \frac{\beta}{180^\circ} \pi - \frac{\left(1 - \frac{2v}{t}\right)}{\cos \frac{\theta}{2}} \sin \beta \right]}{\left(\frac{t}{2}\right)^2 \arccos\left(1 - \frac{2v}{t}\right) - \sqrt{tv - v^2} \left(\frac{t}{2} - v\right)} \times 100. \quad (\text{S7})$$

Equation S7 was implemented in a Fortran program and its average was determined using all 5 membered-neighbors that are common to one crystal setting. The dose was corrected by this average.

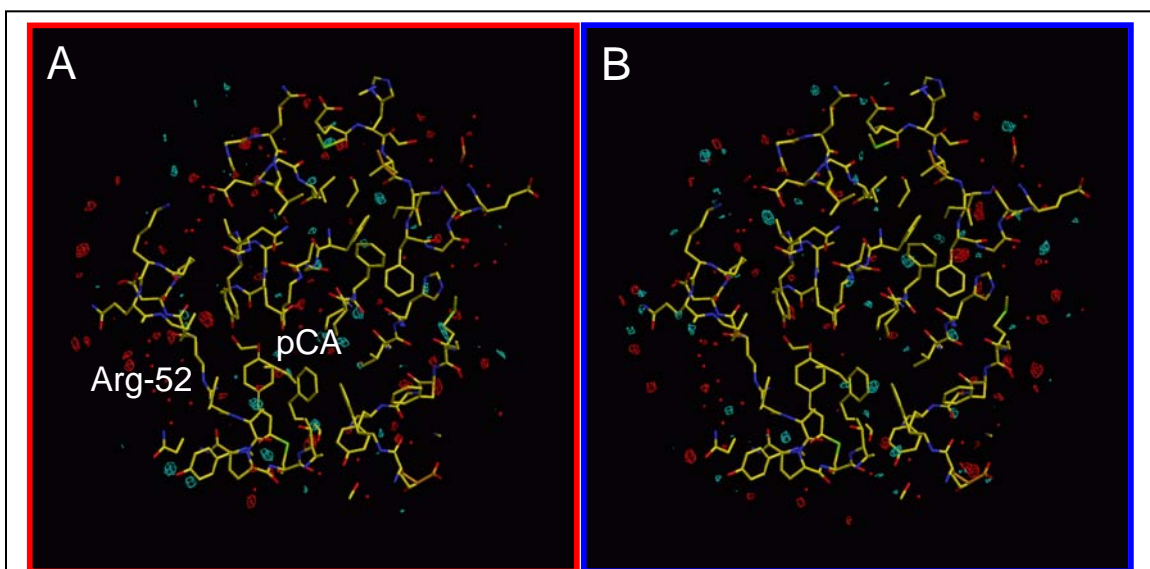

**Figure S2.** Difference maps overlaid on the dark structure of PYP. Panel A: Difference map obtained from the dark data of short time-series 1 and 12 (D12-D1 difference map) contoured on the  $\pm 3$  sigma level (cyan and red, respectively). Panel B: Difference maps obtained from the laser control experiment (D5-D1 difference map). Contour levels as in A.
